# Supplementary material for: Ipilimumab alone or in combination with nivolumab in patients with advanced melanoma who have progressed or relapsed on PD-1 blockade: clinical outcomes and translational biomarker analyses
Source: PubMed Central journal article supplement — J Immunother Cancer. 2022 Jan 24;10(1):e003853. doi: 10.1136/jitc-2021-003853 (PMC8788323; doi:10.1136/jitc-2021-003853), 2022-01-24
Supplement: jitc-2021-003853supp001.pdf [file jitc-2021-003853supp001.pdf]

**Table S1. Details of panel used for CyTOF on PBMC in study patients.**

| <b>Target</b>             | <b>Source</b> | <b>Cat #</b> |
|---------------------------|---------------|--------------|
| CD45                      | Fluidigm      | 3089003B     |
| CD8a                      | Fluidigm      | 3146001B     |
| Ki67                      | Fluidigm      | 3168007B     |
| CD86                      | BioLegend     | 305402       |
| CD3                       | Fluidigm      | 3141019B     |
| CD19                      | Fluidigm      | 3142001B     |
| CD117                     | Fluidigm      | 3143001B     |
| CD11b                     | Fluidigm      | 3144001B     |
| CD4                       | Fluidigm      | 3145001B     |
| CD11c                     | Fluidigm      | 3147008B     |
| CD14                      | Fluidigm      | 3148010B     |
| FcER1                     | Fluidigm      | 3150027B     |
| CD123                     | Fluidigm      | 3151001B     |
| gdTCR                     | Fluidigm      | 3152008B     |
| CD45RA                    | Fluidigm      | 3153001B     |
| TIM3                      | Fluidigm      | 3154010B     |
| CD64                      | BioLegend     | 305002       |
| PD-L1 (CD274)             | Fluidigm      | 3156026B     |
| CD27                      | Fluidigm      | 3158010B     |
| Tbet                      | Fluidigm      | 3160010B     |
| CD152 (CTLA-4)            | Fluidigm      | 3161004B     |
| Foxp3                     | Fluidigm      | 3162011A     |
| CD33                      | Fluidigm      | 3163023B     |
| CD45RO                    | Fluidigm      | 3164007B     |
| CD127                     | Fluidigm      | 3165008B     |
| CCR7 (CD197)              | Fluidigm      | 3167009A     |
| ICOS (CD278)              | Fluidigm      | 3168024B     |
| CD25                      | Fluidigm      | 3169003B     |
| TCR Va24-Ja18 (iNKT cell) | Fluidigm      | 3170015B     |
| CD40                      | BioLegend     | 334302       |
| CD38                      | Fluidigm      | 3172007B     |
| CD192 (CCR2)              | BioLegend     | 357202       |
| HLA-DR                    | Fluidigm      | 3174001B     |
| PD-1                      | Fluidigm      | 3175008B     |

|      |          |          |
|------|----------|----------|
| CD56 | Fluidigm | 3176088B |
| CD16 | Fluidigm | 3209002B |

Immune populations were defined as following, after gating for live singlets(24): CD4 and CD8 T naïve, effector and memory populations were identified based on CD45RA vs CCR7 expression, Tregs were identified based on FoxP3 expression. B cells were identified based on CD19 expression and further distinguished in memory vs naïve vs plasmablast based on expression of CD38 vs CD27. NK cells were identified based on CD56 expression and further subdivided based on CD56 vs CD16 expression. Monocytes were identified based on expression of CD14 and HLA-DR and further subdivided in classical, non-classical and intermediate based on the expression of CD14 vs CD16. Dendritic cells were defined as CD14 and CD16 negative monocytes and further distinguish between myeloid and plasmacytoid based on expression of CD11c vs CD123.

**Table S2. RNA signatures used to evaluate patterns of CB in patients treated with ipilimumab-based therapy that previously progressed on PD-1**

| <b>Signature</b> | <b>Genes</b> |
|------------------|--------------|
| myeloid          | ARG1         |
| myeloid          | NOS2         |
| myeloid          | CXCL3        |
| myeloid          | CXCL2        |
| myeloid          | CSF1R        |
| myeloid          | CCR2         |
| myeloid          | CXCR2        |
| myeloid          | CCR5         |
| tcf7             | NSG2         |
| tcf7             | TNFSF11      |
| tcf7             | ID3          |
| tcf7             | SOSTDC1      |
| tcf7             | CD22         |
| tcf7             | TCF7         |
| tcf7             | CD83         |
| tcf7             | SLFN5        |
| tcf7             | XCL1         |
| tcf7             | LRIG1        |
| tcf7             | MNDA         |
| tcf7             | IFI205       |
| tcf7             | PLAGL1       |
| tcf7             | CXCR5        |
| tcf7             | SLAMF6       |
| tcf7             | GPR183       |
| tcf7             | TNFRSF25     |
| tcf7             | NT5E         |
| tcf7             | ZBTB18       |

|      |               |
|------|---------------|
| tcf7 | CCR6          |
| tcf7 | CPNE3         |
| tcf7 | SOX4          |
| tcf7 | MYB           |
| tcf7 | SH3BP5        |
| tcf7 | CRTAM         |
| tcf7 | MS4A4C        |
| tcf7 | KBTBD11       |
| tcf7 | CXCL10        |
| tcf7 | H2-OB         |
| tcf7 | P2RX7         |
| tcf7 | WIPF3         |
| tcf7 | CD2AP         |
| tcf7 | IL7R          |
| tcf7 | AFF3          |
| tcf7 | OASL2         |
| tcf7 | GPM6B         |
| tcf7 | ST6GAL1       |
| tcf7 | CD200         |
| tcf7 | CAMSAP2       |
| tcf7 | DAPL1         |
| tcf7 | SELL          |
| tcf7 | SPOCK2        |
| tcf7 | H2-OA         |
| tcf7 | 1700019D03RIK |
| tcf7 | TESPA1        |
| tcf7 | SYNPO         |
| tcf7 | TMEM180       |
| tcf7 | BCL6          |
| tcf7 | HGSNAT        |
| tcf7 | ADK           |
| tcf7 | TNFSF14       |
| tcf7 | BTLA          |
| tcf7 | CXCR4         |
| tcf7 | CES2D-PS      |
| tcf7 | CES2C         |
| tcf7 | SATB1         |
| tcf7 | EMB           |
| tcf7 | TGFBR3        |

|      |          |
|------|----------|
| tcf7 | ARHGAP5  |
| tcf7 | KLRB1F   |
| tcf7 | GPR18    |
| tcf7 | FAM43A   |
| tcf7 | TLR3     |
| tcf7 | CLDN10   |
| tcf7 | POU2AF1  |
| tcf7 | ABCA1    |
| tcf7 | HECTD2   |
| tcf7 | ASAP1    |
| tcf7 | PTGFRN   |
| tcf7 | FAM84A   |
| tcf7 | AFAP1    |
| tcf7 | GUCY1A3  |
| tcf7 | DSCAM    |
| tcf7 | KRT10    |
| tcf7 | PLXDC2   |
| tcf7 | FHIT     |
| tcf7 | GALNT9   |
| tcf7 | CD24A    |
| tcf7 | SH2B3    |
| tcf7 | IGF1R    |
| tcf7 | CD81     |
| tcf7 | LEF1     |
| tcf7 | GSTK1    |
| tcf7 | EFNB2    |
| tcf7 | ART3     |
| tcf7 | CCR7     |
| tcf7 | FAM213A  |
| tcf7 | LTA      |
| tcf7 | AI956758 |
| tcf7 | CPQ      |
| tcf7 | HMG3     |
| tcf7 | NTRK3    |
| tcf7 | DZIP1    |
| tcf7 | ZSCAN12  |
| tcf7 | PECAM1   |
| tcf7 | SERPINA9 |
| tcf7 | DDC      |

|      |               |
|------|---------------|
| tcf7 | GM2663        |
| tcf7 | 1810009J06RIK |
| tcf7 | CNN3          |
| tcf7 | TDRP          |
| tcf7 | A930041H05RIK |
| tcf7 | RNF157        |
| tcf7 | TIAM1         |
| tcf7 | JUN           |
| tcr  | AKT1          |
| tcr  | AKT2          |
| tcr  | AKT3          |
| tcr  | BCL10         |
| tcr  | CARD11        |
| tcr  | CBL           |
| tcr  | CBLB          |
| tcr  | CBLC          |
| tcr  | CD247         |
| tcr  | CD28          |
| tcr  | CD3D          |
| tcr  | CD3E          |
| tcr  | CD3G          |
| tcr  | CD4           |
| tcr  | CD40LG        |
| tcr  | CD8A          |
| tcr  | CD8B          |
| tcr  | CDC42         |
| tcr  | CDK4          |
| tcr  | CHP1          |
| tcr  | CHP2          |
| tcr  | CHUK          |
| tcr  | CSF2          |
| tcr  | CTLA4         |
| tcr  | DLG1          |
| tcr  | FOS           |
| tcr  | FYN           |
| tcr  | GRAP2         |
| tcr  | GRB2          |
| tcr  | GSK3B         |
| tcr  | HRAS          |

|     |         |
|-----|---------|
| tcr | ICOS    |
| tcr | IFNG    |
| tcr | IKBKB   |
| tcr | IKBKG   |
| tcr | IL10    |
| tcr | IL2     |
| tcr | IL4     |
| tcr | IL5     |
| tcr | ITK     |
| tcr | JUN     |
| tcr | KRAS    |
| tcr | LAT     |
| tcr | LCK     |
| tcr | LCP2    |
| tcr | MALT1   |
| tcr | MAP2K1  |
| tcr | MAP2K2  |
| tcr | MAP2K7  |
| tcr | MAP3K14 |
| tcr | MAP3K7  |
| tcr | MAP3K8  |
| tcr | MAPK1   |
| tcr | MAPK11  |
| tcr | MAPK12  |
| tcr | MAPK13  |
| tcr | MAPK14  |
| tcr | MAPK3   |
| tcr | MAPK9   |
| tcr | NCK1    |
| tcr | NCK2    |
| tcr | NFAT5   |
| tcr | NFATC1  |
| tcr | NFATC2  |
| tcr | NFATC3  |
| tcr | NFATC4  |
| tcr | NFKB1   |
| tcr | NFKBIA  |
| tcr | NFKBIB  |
| tcr | NFKBIE  |

|      |            |
|------|------------|
| tcr  | NRAS       |
| tcr  | PAK1       |
| tcr  | PAK2       |
| tcr  | PAK3       |
| tcr  | PAK4       |
| tcr  | PAK5       |
| tcr  | PAK6       |
| tcr  | PDCD1      |
| tcr  | PDPK1      |
| tcr  | PIK3CA     |
| tcr  | PIK3CB     |
| tcr  | PIK3CD     |
| tcr  | PIK3CG     |
| tcr  | PIK3R1     |
| tcr  | PIK3R2     |
| tcr  | PIK3R3     |
| tcr  | PIK3R5     |
| tcr  | PLCG1      |
| tcr  | PPP3CA     |
| tcr  | PPP3CB     |
| tcr  | PPP3CC     |
| tcr  | PPP3R1     |
| tcr  | PPP3R2     |
| tcr  | PRKCQ      |
| tcr  | PTPN6      |
| tcr  | PTPRC      |
| tcr  | RAF1       |
| tcr  | RASGRP1    |
| tcr  | RELA       |
| tcr  | RHOA       |
| tcr  | SOS1       |
| tcr  | SOS2       |
| tcr  | TEC        |
| tcr  | TNF        |
| tcr  | VAV1       |
| tcr  | VAV2       |
| tcr  | VAV3       |
| tcr  | ZAP70      |
| ifna | AC004551.1 |



|      |         |
|------|---------|
| ifna | ADAR    |
| ifna | B2M     |
| ifna | BATF2   |
| ifna | BST2    |
| ifna | C1S     |
| ifna | CASP1   |
| ifna | CASP8   |
| ifna | CCRL2   |
| ifna | CD47    |
| ifna | CD74    |
| ifna | CMPK2   |
| ifna | CMTR1   |
| ifna | CNP     |
| ifna | CSF1    |
| ifna | CXCL10  |
| ifna | CXCL11  |
| ifna | DDX60   |
| ifna | DHX58   |
| ifna | EIF2AK2 |
| ifna | ELF1    |
| ifna | EPSTI1  |
| ifna | GBP2    |
| ifna | GBP4    |
| ifna | GMPR    |
| ifna | HELZ2   |
| ifna | HERC6   |
| ifna | HLA-C   |
| ifna | IFI27   |
| ifna | IFI30   |
| ifna | IFI35   |
| ifna | IFI44   |
| ifna | IFI44L  |
| ifna | IFIH1   |
| ifna | IFIT2   |
| ifna | IFIT3   |
| ifna | IFITM1  |
| ifna | IFITM2  |
| ifna | IFITM3  |
| ifna | IL15    |

|      |          |
|------|----------|
| ifna | IL4R     |
| ifna | IL7      |
| ifna | IRF1     |
| ifna | IRF2     |
| ifna | IRF7     |
| ifna | IRF9     |
| ifna | ISG15    |
| ifna | ISG20    |
| ifna | LAMP3    |
| ifna | LAP3     |
| ifna | LGALS3BP |
| ifna | LPAR6    |
| ifna | LY6E     |
| ifna | MOV10    |
| ifna | MVB12A   |
| ifna | MX1      |
| ifna | NCOA7    |
| ifna | NMI      |
| ifna | NUB1     |
| ifna | OASL     |
| ifna | OGFR     |
| ifna | PARP12   |
| ifna | PARP14   |
| ifna | PARP9    |
| ifna | PLSCR1   |
| ifna | PNPT1    |
| ifna | PROCR    |
| ifna | PSMA3    |
| ifna | PSMB8    |
| ifna | PSMB9    |
| ifna | PSME1    |
| ifna | PSME2    |
| ifna | RIPK2    |
| ifna | RNF31    |
| ifna | RSAD2    |
| ifna | RTP4     |
| ifna | SAMD9    |
| ifna | SAMD9L   |
| ifna | SELL     |

|      |          |
|------|----------|
| ifna | SLC25A28 |
| ifna | SP110    |
| ifna | STAT2    |
| ifna | TAP1     |
| ifna | TDRD7    |
| ifna | TENT5A   |
| ifna | TMEM140  |
| ifna | TRAFD1   |
| ifna | TRIM14   |
| ifna | TRIM21   |
| ifna | TRIM25   |
| ifna | TRIM26   |
| ifna | TRIM5    |
| ifna | TXNIP    |
| ifna | UBA7     |
| ifna | UBE2L6   |
| ifna | USP18    |
| ifna | WARS     |
| ifng | ACVR1    |
| ifng | APC      |
| ifng | ARID4B   |
| ifng | BCAR3    |
| ifng | BMP2     |
| ifng | BMPR1A   |
| ifng | BMPR2    |
| ifng | CDH1     |
| ifng | CDK9     |
| ifng | CDKN1C   |
| ifng | CTNNB1   |
| ifng | ENG      |
| ifng | FKBP1A   |
| ifng | FNTA     |
| ifng | FURIN    |
| ifng | HDAC1    |
| ifng | HIPK2    |
| ifng | ID1      |
| ifng | ID2      |
| ifng | ID3      |
| ifng | IFNGR2   |

|              |          |
|--------------|----------|
| ifng         | JUNB     |
| ifng         | KLF10    |
| ifng         | LEFTY2   |
| ifng         | LTBP2    |
| ifng         | MAP3K7   |
| ifng         | NCOR2    |
| ifng         | NOG      |
| ifng         | PMEPA1   |
| ifng         | PPM1A    |
| ifng         | PPP1CA   |
| ifng         | PPP1R15A |
| ifng         | RAB31    |
| ifng         | RHOA     |
| ifng         | SERPINE1 |
| ifng         | SKI      |
| ifng         | SKIL     |
| ifng         | SLC20A1  |
| ifng         | SMAD1    |
| ifng         | SMAD3    |
| ifng         | SMAD6    |
| ifng         | SMAD7    |
| ifng         | SMURF1   |
| ifng         | SMURF2   |
| ifng         | SPTBN1   |
| ifng         | TGFB1    |
| ifng         | TGFBR1   |
| ifng         | TGIF1    |
| ifng         | THBS1    |
| ifng         | TJP1     |
| ifng         | TRIM33   |
| ifng         | UBE2D3   |
| ifng         | WWTR1    |
| ifng         | XIAP     |
| antigen.proc | B2M      |
| antigen.proc | CALR     |
| antigen.proc | CANX     |
| antigen.proc | CD4      |
| antigen.proc | CD74     |
| antigen.proc | CD8A     |

|              |          |
|--------------|----------|
| antigen.proc | CD8B     |
| antigen.proc | CIITA    |
| antigen.proc | CREB1    |
| antigen.proc | CTSB     |
| antigen.proc | CTSL     |
| antigen.proc | CTSS     |
| antigen.proc | HLA-A    |
| antigen.proc | HLA-B    |
| antigen.proc | HLA-C    |
| antigen.proc | HLA-DMA  |
| antigen.proc | HLA-DMB  |
| antigen.proc | HLA-DOA  |
| antigen.proc | HLA-DOB  |
| antigen.proc | HLA-DPA1 |
| antigen.proc | HLA-DPB1 |
| antigen.proc | HLA-DQA1 |
| antigen.proc | HLA-DQA2 |
| antigen.proc | HLA-DQB1 |
| antigen.proc | HLA-DRA  |
| antigen.proc | HLA-DRB1 |
| antigen.proc | HLA-DRB3 |
| antigen.proc | HLA-DRB4 |
| antigen.proc | HLA-DRB5 |
| antigen.proc | HLA-E    |
| antigen.proc | HLA-F    |
| antigen.proc | HLA-G    |
| antigen.proc | HSP90AA1 |
| antigen.proc | HSP90AB1 |
| antigen.proc | HSPA1A   |
| antigen.proc | HSPA1B   |
| antigen.proc | HSPA1L   |
| antigen.proc | HSPA2    |
| antigen.proc | HSPA4    |
| antigen.proc | HSPA5    |
| antigen.proc | HSPA6    |
| antigen.proc | HSPA8    |
| antigen.proc | IFI30    |
| antigen.proc | IFNA1    |
| antigen.proc | IFNA10   |

|              |          |
|--------------|----------|
| antigen.proc | IFNA13   |
| antigen.proc | IFNA14   |
| antigen.proc | IFNA16   |
| antigen.proc | IFNA17   |
| antigen.proc | IFNA2    |
| antigen.proc | IFNA21   |
| antigen.proc | IFNA4    |
| antigen.proc | IFNA5    |
| antigen.proc | IFNA6    |
| antigen.proc | IFNA7    |
| antigen.proc | IFNA8    |
| antigen.proc | KIR2DL1  |
| antigen.proc | KIR2DL2  |
| antigen.proc | KIR2DL3  |
| antigen.proc | KIR2DL4  |
| antigen.proc | KIR2DL5A |
| antigen.proc | KIR2DS1  |
| antigen.proc | KIR2DS3  |
| antigen.proc | KIR2DS4  |
| antigen.proc | KIR2DS5  |
| antigen.proc | KIR3DL1  |
| antigen.proc | KIR3DL2  |
| antigen.proc | KIR3DL3  |
| antigen.proc | KLRC1    |
| antigen.proc | KLRC2    |
| antigen.proc | KLRC3    |
| antigen.proc | KLRC4    |
| antigen.proc | KLRD1    |
| antigen.proc | LGMN     |
| antigen.proc | LTA      |
| antigen.proc | NFYA     |
| antigen.proc | NFYB     |
| antigen.proc | NFYC     |
| antigen.proc | PDIA3    |
| antigen.proc | PSME1    |
| antigen.proc | PSME2    |
| antigen.proc | PSME3    |
| antigen.proc | RFX5     |
| antigen.proc | RFXANK   |

|              |          |
|--------------|----------|
| antigen.proc | RFXAP    |
| antigen.proc | TAP1     |
| antigen.proc | TAP2     |
| antigen.proc | TAPBP    |
| vegf         | AKT1     |
| vegf         | AKT2     |
| vegf         | AKT3     |
| vegf         | BAD      |
| vegf         | CASP9    |
| vegf         | CDC42    |
| vegf         | CHP1     |
| vegf         | CHP2     |
| vegf         | HRAS     |
| vegf         | HSPB1    |
| vegf         | JMJD7-   |
| vegf         | PLA2G4B  |
| vegf         | KDR      |
| vegf         | KRAS     |
| vegf         | MAP2K1   |
| vegf         | MAP2K2   |
| vegf         | MAPK1    |
| vegf         | MAPK11   |
| vegf         | MAPK12   |
| vegf         | MAPK13   |
| vegf         | MAPK14   |
| vegf         | MAPK3    |
| vegf         | MAPKAPK2 |
| vegf         | MAPKAPK3 |
| vegf         | NFAT5    |
| vegf         | NFATC1   |
| vegf         | NFATC2   |
| vegf         | NFATC3   |
| vegf         | NFATC4   |
| vegf         | NOS3     |
| vegf         | NRAS     |
| vegf         | PIK3CA   |
| vegf         | PIK3CB   |
| vegf         | PIK3CD   |
| vegf         | PIK3CG   |

|      |          |
|------|----------|
| vegf | PIK3R1   |
| vegf | PIK3R2   |
| vegf | PIK3R3   |
| vegf | PIK3R5   |
| vegf | PLA2G10  |
| vegf | PLA2G12A |
| vegf | PLA2G12B |
| vegf | PLA2G1B  |
| vegf | PLA2G2A  |
| vegf | PLA2G2C  |
| vegf | PLA2G2D  |
| vegf | PLA2G2E  |
| vegf | PLA2G2F  |
| vegf | PLA2G3   |
| vegf | PLA2G4A  |
| vegf | PLA2G4B  |
| vegf | PLA2G4E  |
| vegf | PLA2G5   |
| vegf | PLA2G6   |
| vegf | PLCG1    |
| vegf | PLCG2    |
| vegf | PPP3CA   |
| vegf | PPP3CB   |
| vegf | PPP3CC   |
| vegf | PPP3R1   |
| vegf | PPP3R2   |
| vegf | PRKCA    |
| vegf | PRKCB    |
| vegf | PRKCG    |
| vegf | PTGS2    |
| vegf | PTK2     |
| vegf | PXN      |
| vegf | RAC1     |
| vegf | RAC2     |
| vegf | RAC3     |
| vegf | RAF1     |
| vegf | SH2D2A   |
| vegf | SHC2     |
| vegf | SPHK1    |



|      |        |
|------|--------|
| vegf | SPHK2  |
| vegf | SRC    |
| vegf | VEGFA  |
| nk   | ARAF   |
| nk   | BID    |
| nk   | BRAF   |
| nk   | CASP3  |
| nk   | CD244  |
| nk   | CD247  |
| nk   | CD48   |
| nk   | CHP1   |
| nk   | CHP2   |
| nk   | CSF2   |
| nk   | FAS    |
| nk   | FASLG  |
| nk   | FCER1G |
| nk   | FCGR3A |
| nk   | FCGR3B |
| nk   | FYN    |
| nk   | GRB2   |
| nk   | GZMB   |
| nk   | HCST   |
| nk   | HLA-A  |
| nk   | HLA-B  |
| nk   | HLA-C  |
| nk   | HLA-E  |
| nk   | HLA-G  |
| nk   | HRAS   |
| nk   | ICAM1  |
| nk   | ICAM2  |
| nk   | IFNA1  |
| nk   | IFNA10 |
| nk   | IFNA13 |
| nk   | IFNA14 |
| nk   | IFNA16 |
| nk   | IFNA17 |
| nk   | IFNA2  |
| nk   | IFNA21 |
| nk   | IFNA4  |

|    |          |
|----|----------|
| nk | IFNA5    |
| nk | IFNA6    |
| nk | IFNA7    |
| nk | IFNA8    |
| nk | IFNAR1   |
| nk | IFNAR2   |
| nk | IFNB1    |
| nk | IFNG     |
| nk | IFNGR1   |
| nk | IFNGR2   |
| nk | ITGAL    |
| nk | ITGB2    |
| nk | KIR2DL1  |
| nk | KIR2DL2  |
| nk | KIR2DL3  |
| nk | KIR2DL4  |
| nk | KIR2DL5A |
| nk | KIR2DS1  |
| nk | KIR2DS3  |
| nk | KIR2DS4  |
| nk | KIR2DS5  |
| nk | KIR3DL1  |
| nk | KIR3DL2  |
| nk | KLRC1    |
| nk | KLRC2    |
| nk | KLRC3    |
| nk | KLRD1    |
| nk | KLRK1    |
| nk | KRAS     |
| nk | LAT      |
| nk | LCK      |
| nk | LCP2     |
| nk | MAP2K1   |
| nk | MAP2K2   |
| nk | MAPK1    |
| nk | MAPK3    |
| nk | MICA     |
| nk | MICB     |
| nk | NCR1     |

|    |        |
|----|--------|
| nk | NCR2   |
| nk | NCR3   |
| nk | NFAT5  |
| nk | NFATC1 |
| nk | NFATC2 |
| nk | NFATC3 |
| nk | NFATC4 |
| nk | NRAS   |
| nk | PAK1   |
| nk | PIK3CA |
| nk | PIK3CB |
| nk | PIK3CD |
| nk | PIK3CG |
| nk | PIK3R1 |
| nk | PIK3R2 |
| nk | PIK3R3 |
| nk | PIK3R5 |
| nk | PLCG1  |
| nk | PLCG2  |
| nk | PPP3CA |
| nk | PPP3CB |
| nk | PPP3CC |
| nk | PPP3R1 |
| nk | PPP3R2 |
| nk | PRF1   |
| nk | PRKCA  |
| nk | PRKCB  |
| nk | PRKCG  |
| nk | PTK2B  |
| nk | PTPN11 |
| nk | PTPN6  |
| nk | RAC1   |
| nk | RAC2   |
| nk | RAC3   |
| nk | RAET1E |
| nk | RAET1G |
| nk | RAET1L |
| nk | RAF1   |
| nk | SH2D1A |

|     |           |
|-----|-----------|
| nk  | SH2D1B    |
| nk  | SH3BP2    |
| nk  | SHC1      |
| nk  | SHC2      |
| nk  | SHC3      |
| nk  | SHC4      |
| nk  | SOS1      |
| nk  | SOS2      |
| nk  | SYK       |
| nk  | TNF       |
| nk  | TNFRSF10A |
| nk  | TNFRSF10B |
| nk  | TNFRSF10C |
| nk  | TNFRSF10D |
| nk  | TNFSF10   |
| nk  | TYROBP    |
| nk  | ULBP1     |
| nk  | ULBP2     |
| nk  | ULBP3     |
| nk  | VAV1      |
| nk  | VAV2      |
| nk  | VAV3      |
| nk  | ZAP70     |
| wnt | ACTB      |
| wnt | APC       |
| wnt | AXIN1     |
| wnt | B2M       |
| wnt | BCL9      |
| wnt | BTRC      |
| wnt | CCN4      |
| wnt | CCND1     |
| wnt | CCND2     |
| wnt | CCND3     |
| wnt | CSNK1A1   |
| wnt | CSNK1D    |
| wnt | CSNK1G1   |
| wnt | CSNK2A1   |
| wnt | CTBP1     |
| wnt | CTBP2     |

|     |          |
|-----|----------|
| wnt | CTNNB1   |
| wnt | CTNNBIP1 |
| wnt | CXXC4    |
| wnt | DAAM1    |
| wnt | DIXDC1   |
| wnt | DKK1     |
| wnt | DVL1     |
| wnt | DVL2     |
| wnt | EP300    |
| wnt | FBXW11   |
| wnt | FBXW2    |
| wnt | FBXW4    |
| wnt | FGF4     |
| wnt | FOSL1    |
| wnt | FOXN1    |
| wnt | FRAT1    |
| wnt | FRZB     |
| wnt | FSHB     |
| wnt | FZD1     |
| wnt | FZD2     |
| wnt | FZD3     |
| wnt | FZD4     |
| wnt | FZD5     |
| wnt | FZD6     |
| wnt | FZD7     |
| wnt | FZD8     |
| wnt | GAPDH    |
| wnt | GSK3A    |
| wnt | GSK3B    |
| wnt | HPRT1    |
| wnt | JUN      |
| wnt | KREMEN1  |
| wnt | LEF1     |
| wnt | LRP5     |
| wnt | LRP6     |
| wnt | MYC      |
| wnt | NKD1     |
| wnt | NLK      |
| wnt | PITX2    |

|     |          |
|-----|----------|
| wnt | PORCN    |
| wnt | PPP2CA   |
| wnt | PPP2R1A  |
| wnt | PYGO1    |
| wnt | RHOU     |
| wnt | RPL13A   |
| wnt | SEN2     |
| wnt | SFRP1    |
| wnt | SFRP4    |
| wnt | SLC9A3R1 |
| wnt | SOX17    |
| wnt | TBXT     |
| wnt | TCF7     |
| wnt | TCF7L1   |
| wnt | TLE1     |
| wnt | TLE2     |
| wnt | TLE5     |
| wnt | WIF1     |
| wnt | WNT1     |
| wnt | WNT10A   |
| wnt | WNT11    |
| wnt | WNT16    |
| wnt | WNT2     |
| wnt | WNT2B    |
| wnt | WNT3     |
| wnt | WNT3A    |
| wnt | WNT4     |
| wnt | WNT5A    |
| wnt | WNT5B    |
| wnt | WNT6     |
| wnt | WNT7A    |
| wnt | WNT7B    |
| wnt | WNT8A    |
| wnt | WNT9A    |
| ras | AKT1     |
| ras | BAD      |
| ras | CASP9    |
| ras | CDC42    |
| ras | CHUK     |

|               |        |
|---------------|--------|
| ras           | ELK1   |
| ras           | FOXO4  |
| ras           | HRAS   |
| ras           | MAP2K1 |
| ras           | MAPK3  |
| ras           | NFKB1  |
| ras           | PIK3CA |
| ras           | PIK3CG |
| ras           | PIK3R1 |
| ras           | PLD1   |
| ras           | RAC1   |
| ras           | RAF1   |
| ras           | RALA   |
| ras           | RALBP1 |
| ras           | RALGDS |
| ras           | RELA   |
| ras           | RHOA   |
| Active immune | ARG1   |
| Active immune | Nos2   |
| Active immune | CXCL3  |
| Active immune | CXCL2  |
| Active immune | CSF1r  |
| Active immune | CCR2   |
| Active immune | CXCR2  |
| Active immune | CCR5   |
