# Supplementary material for: Ipilimumab alone or in combination with nivolumab in patients with advanced melanoma who have progressed or relapsed on PD-1 blockade: clinical outcomes and translational biomarker analyses
Source: PubMed Central journal article supplement — J Immunother Cancer. 2022 Jan 24;10(1):e003853. doi: 10.1136/jitc-2021-003853 (PMC8788323; doi:10.1136/jitc-2021-003853), 2022-01-24

**Fig S5. Lack of association between TMB and clinical benefit among melanoma patients treated with Ipilimumab or Ipilimumab in combination with Nivolumab after progression on PD-1 monotherapy.**

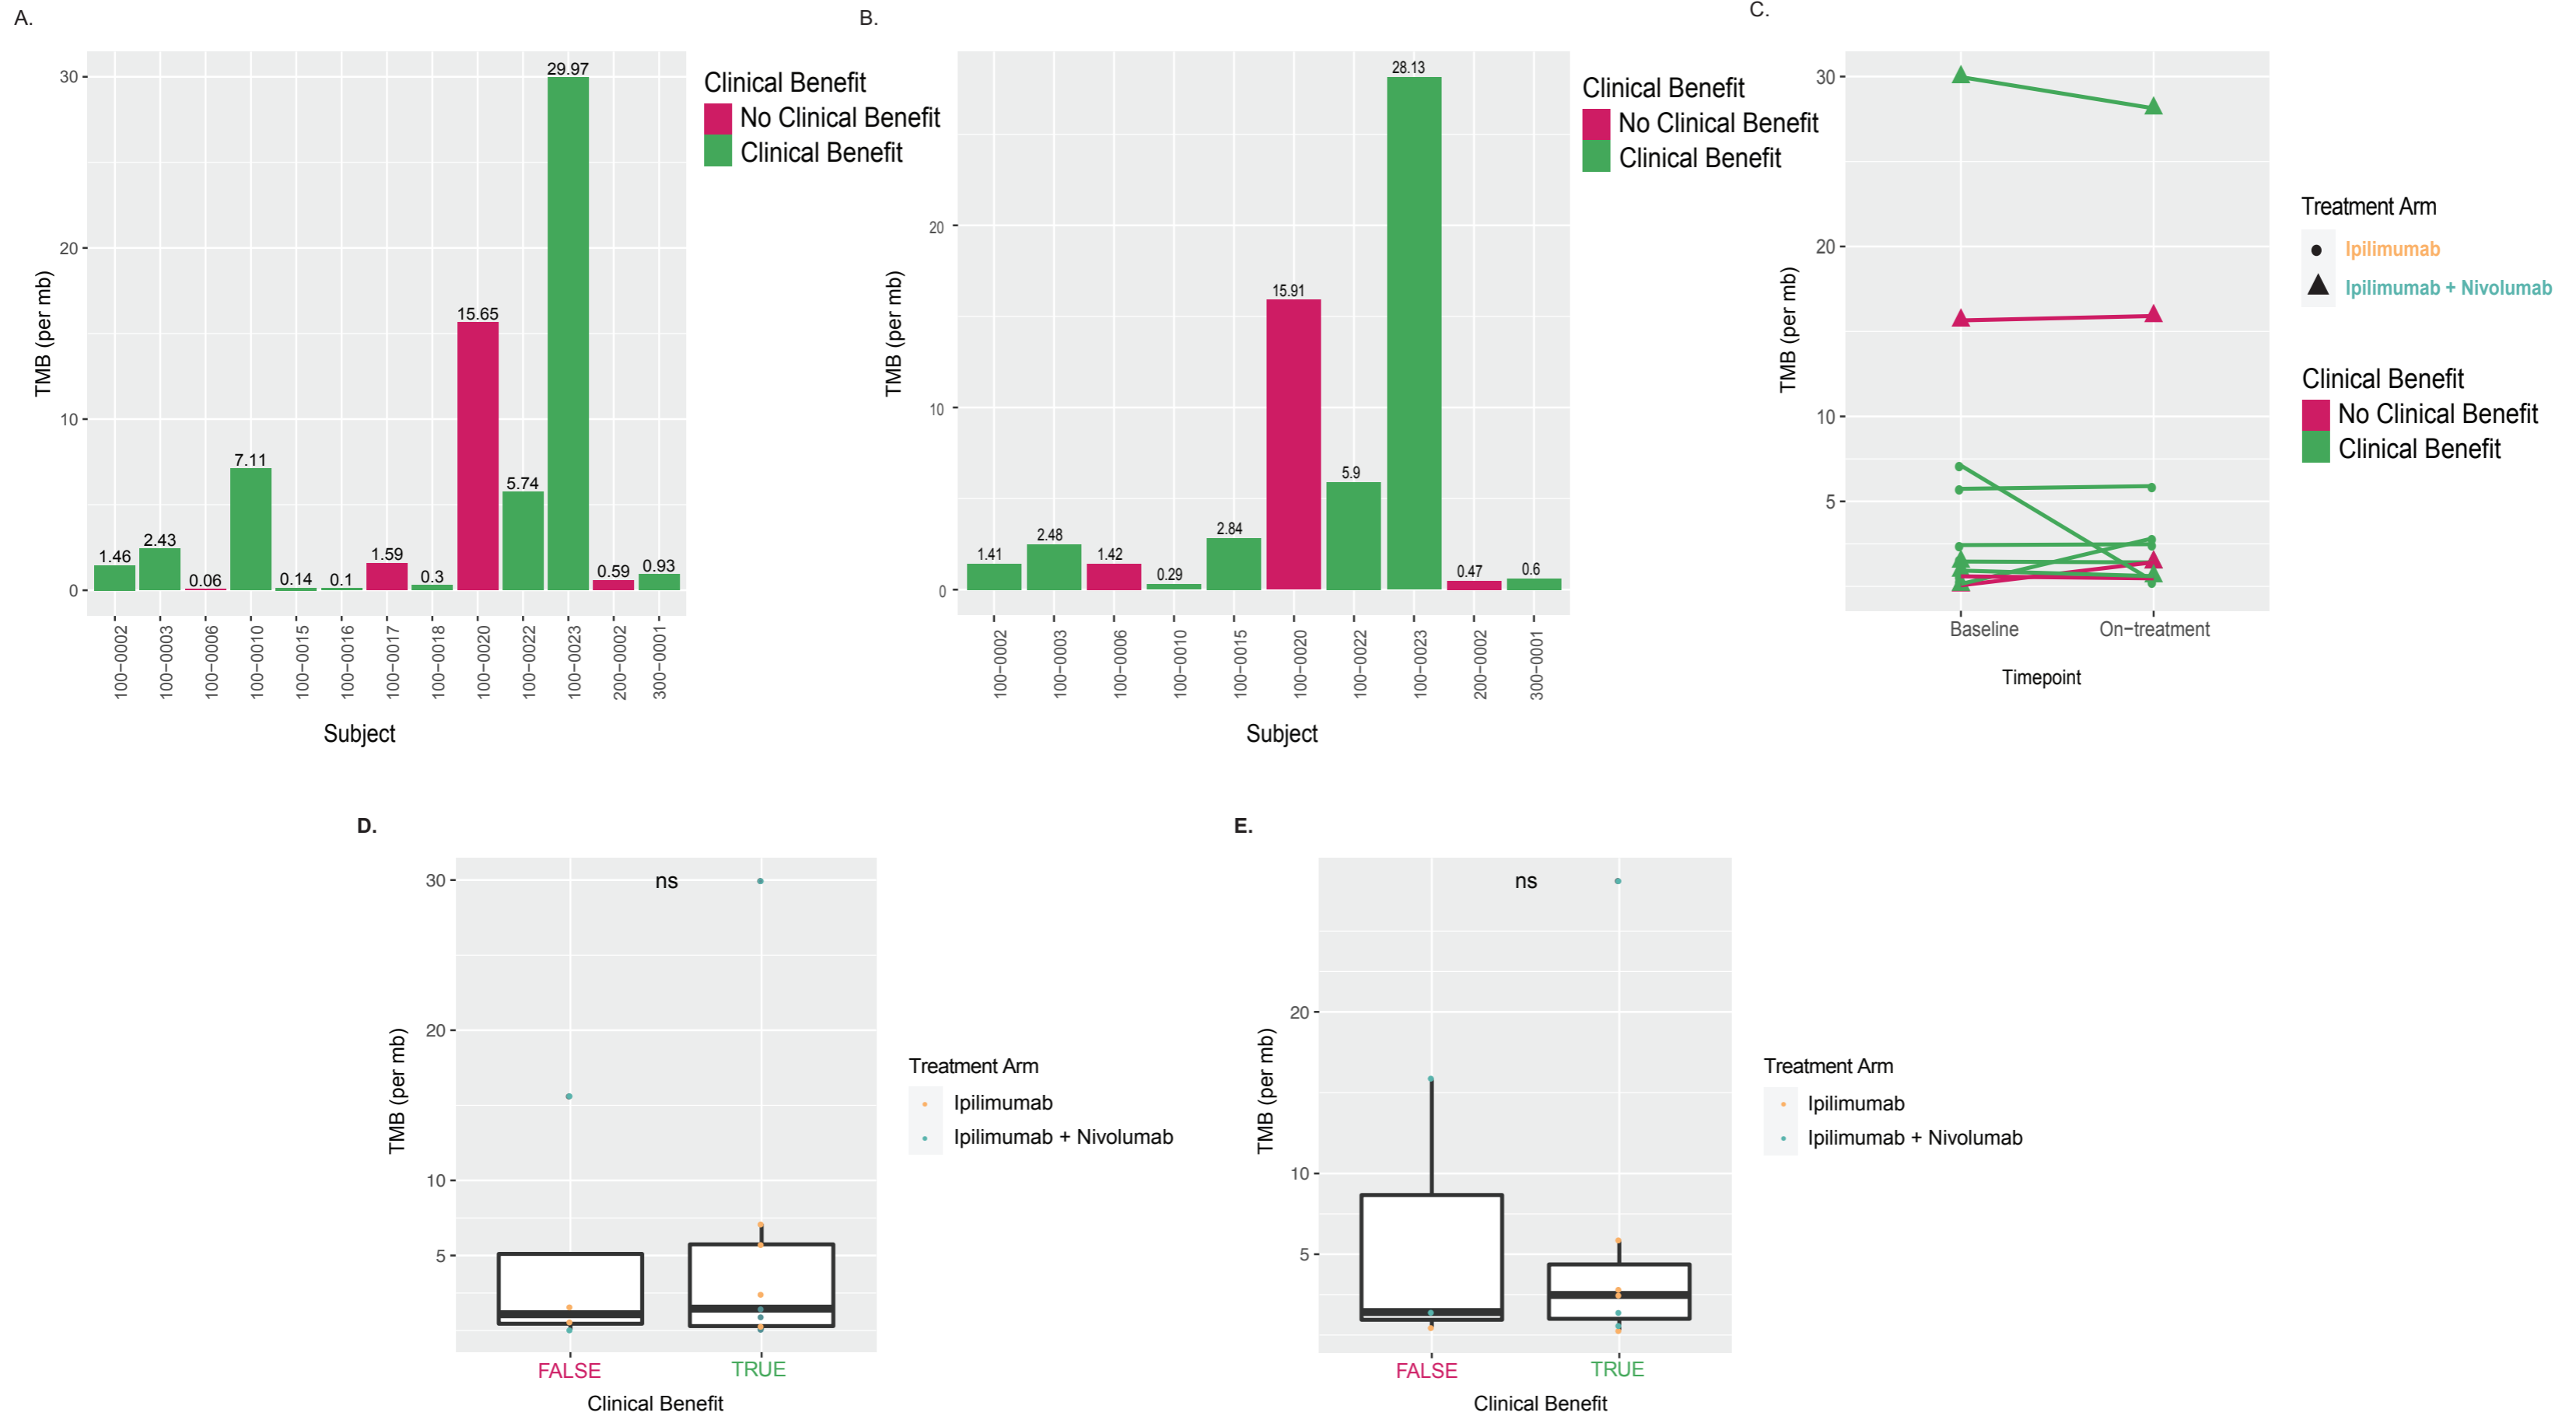

Supplement: jitc-2021-003853supp007.pdf [file jitc-2021-003853supp007.pdf]
