# Supplementary material for: Ipilimumab alone or in combination with nivolumab in patients with advanced melanoma who have progressed or relapsed on PD-1 blockade: clinical outcomes and translational biomarker analyses
Source: PubMed Central journal article supplement — J Immunother Cancer. 2022 Jan 24;10(1):e003853. doi: 10.1136/jitc-2021-003853 (PMC8788323; doi:10.1136/jitc-2021-003853), 2022-01-24

Fig S6. Heatmaps of tumor signatures and immune populations by RNA sequencing at additional timepoints and by sample processing type.

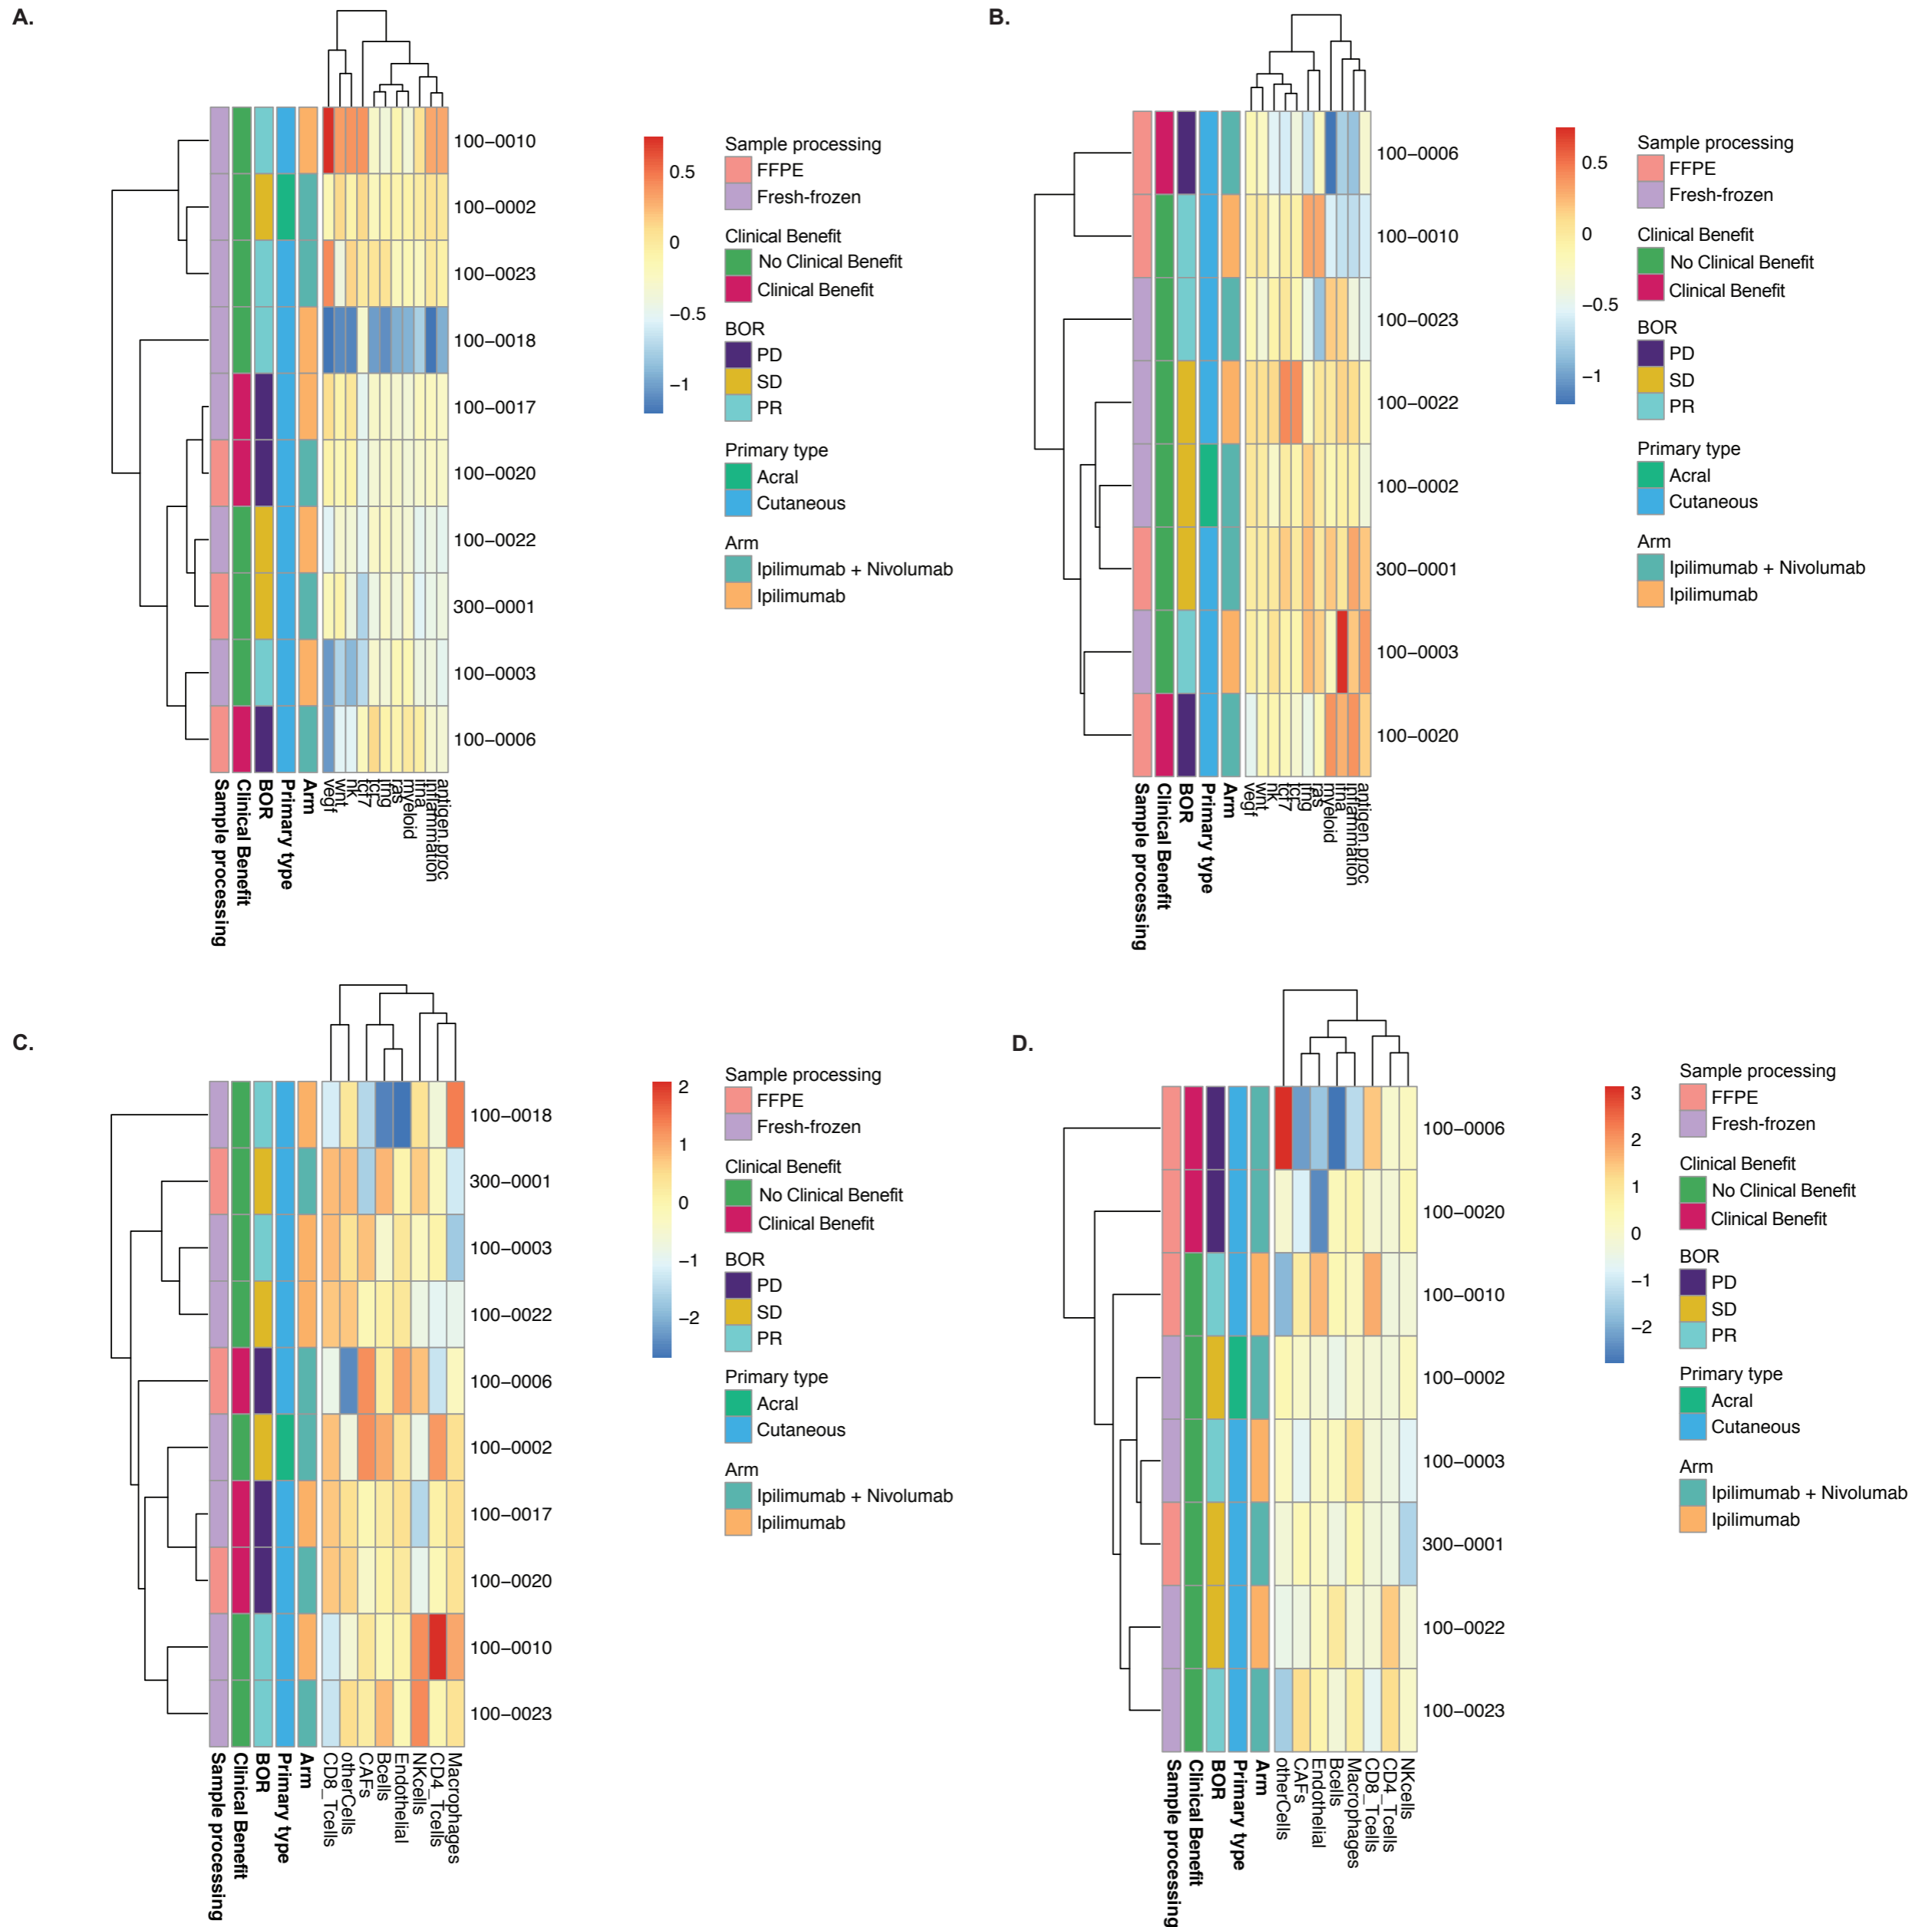

Supplement: jitc-2021-003853supp008.pdf [file jitc-2021-003853supp008.pdf]
