# Supplementary material for: Ipilimumab alone or in combination with nivolumab in patients with advanced melanoma who have progressed or relapsed on PD-1 blockade: clinical outcomes and translational biomarker analyses
Source: HighWire-hosted journal article supplement (doi:10.1136/jitc-2021-003853), 2022-01-01

**Fig S7. Peripheral NK cell trends over time in PD-1 progressors treated with ipilimumab monotherapy or ipilimumab in combination with nivolumab.**

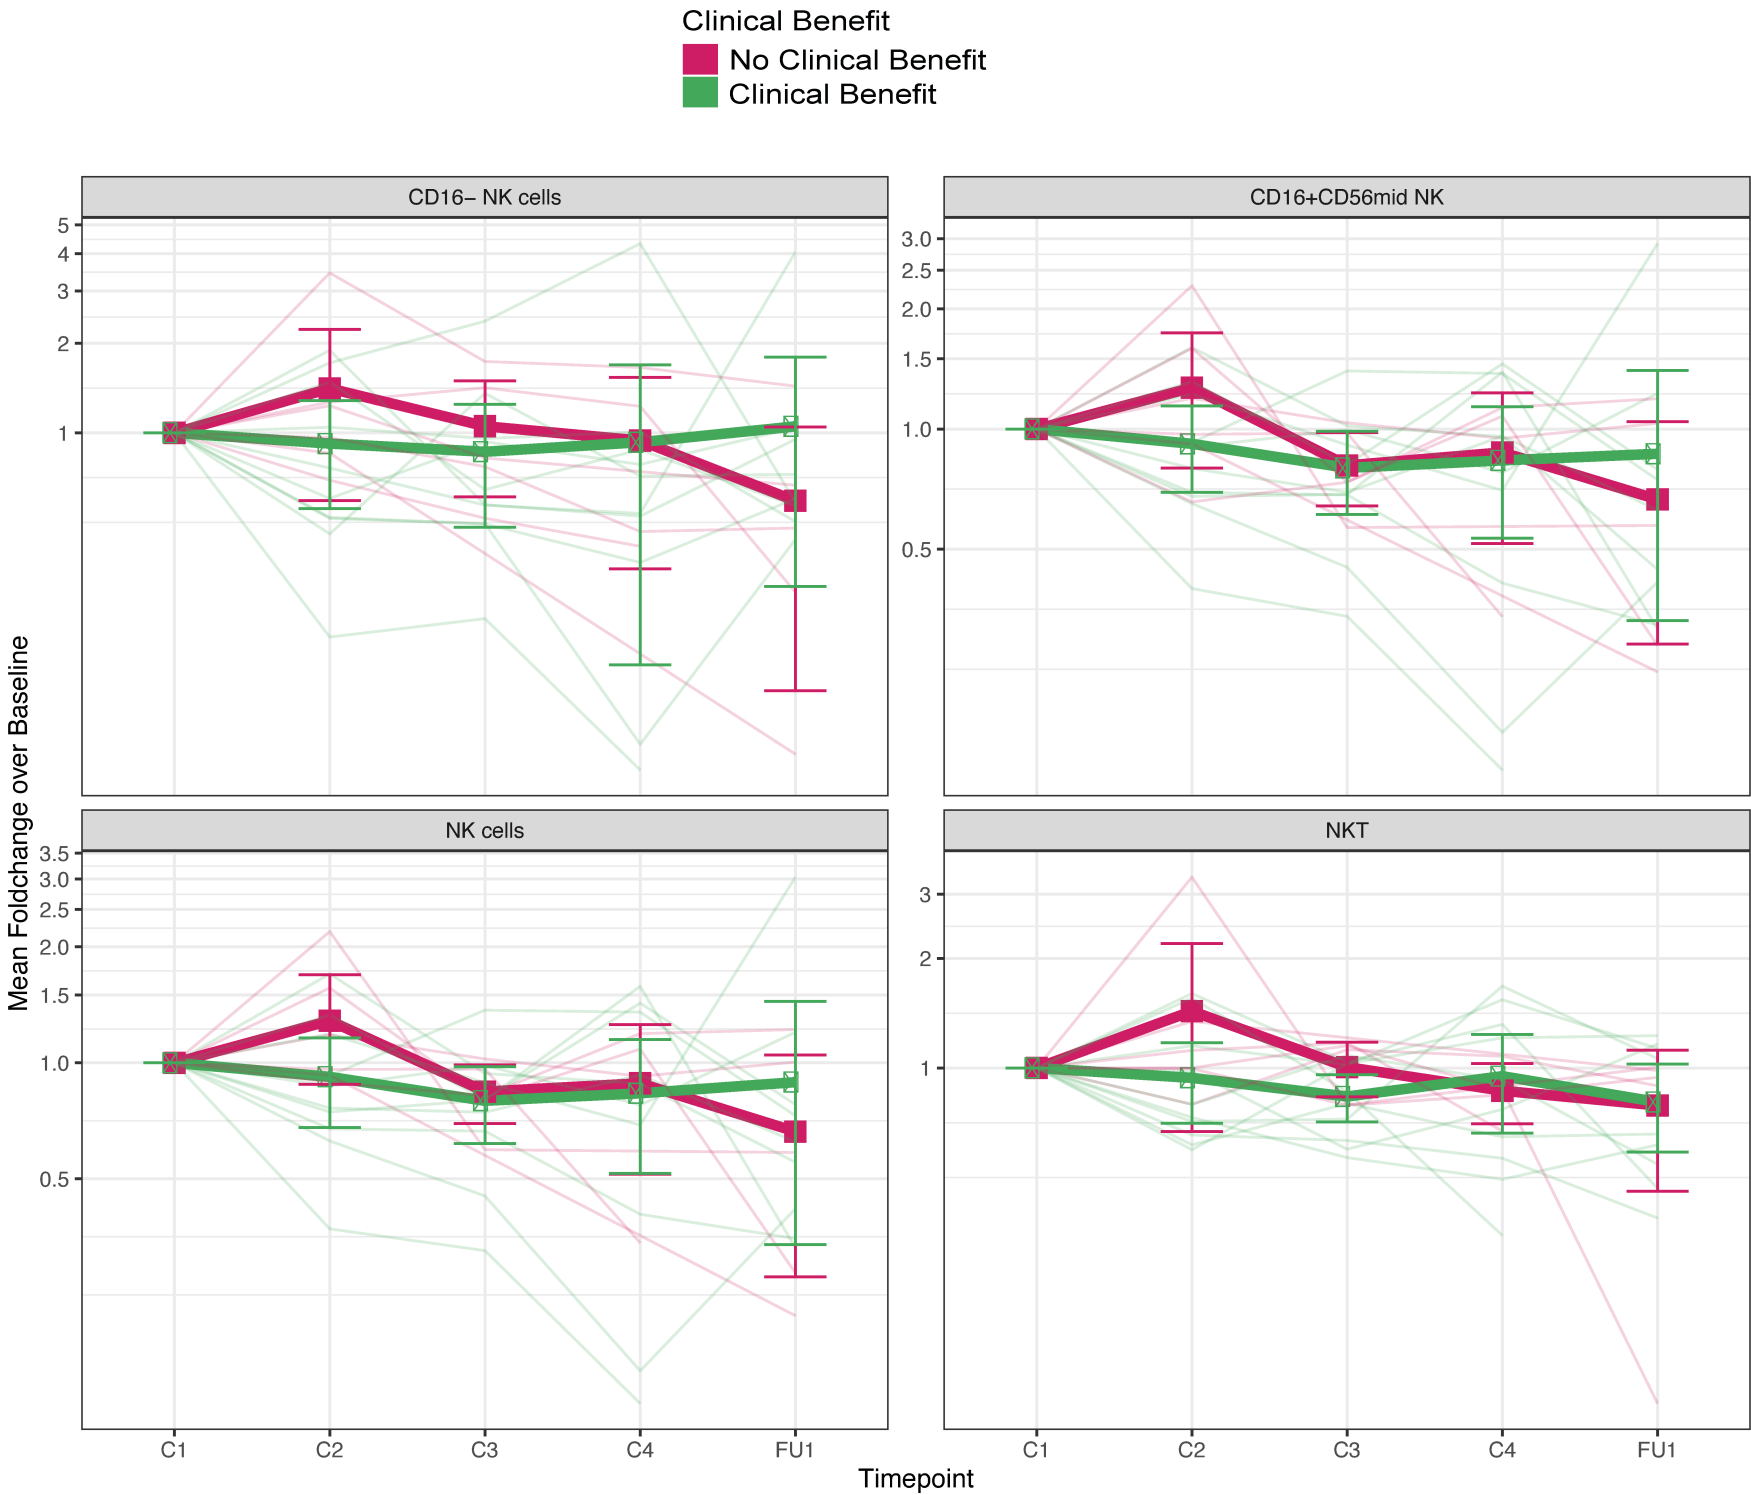

Supplement: jitc-2021-003853supp009_data_supplement.pdf [file jitc-2021-003853supp009_data_supplement.pdf]
