# Supplementary figures and images for: Ipilimumab alone or in combination with nivolumab in patients with advanced melanoma who have progressed or relapsed on PD-1 blockade: clinical outcomes and translational biomarker analyses
Source: PubMed Central journal article supplement — J Immunother Cancer. 2022 Jan 24;10(1):e003853. doi: 10.1136/jitc-2021-003853 (PMC8788323; doi:10.1136/jitc-2021-003853), 2022-01-24

Figure S1. CONSORT Flow Diagram

**CONSORT 2010 Flow Diagram**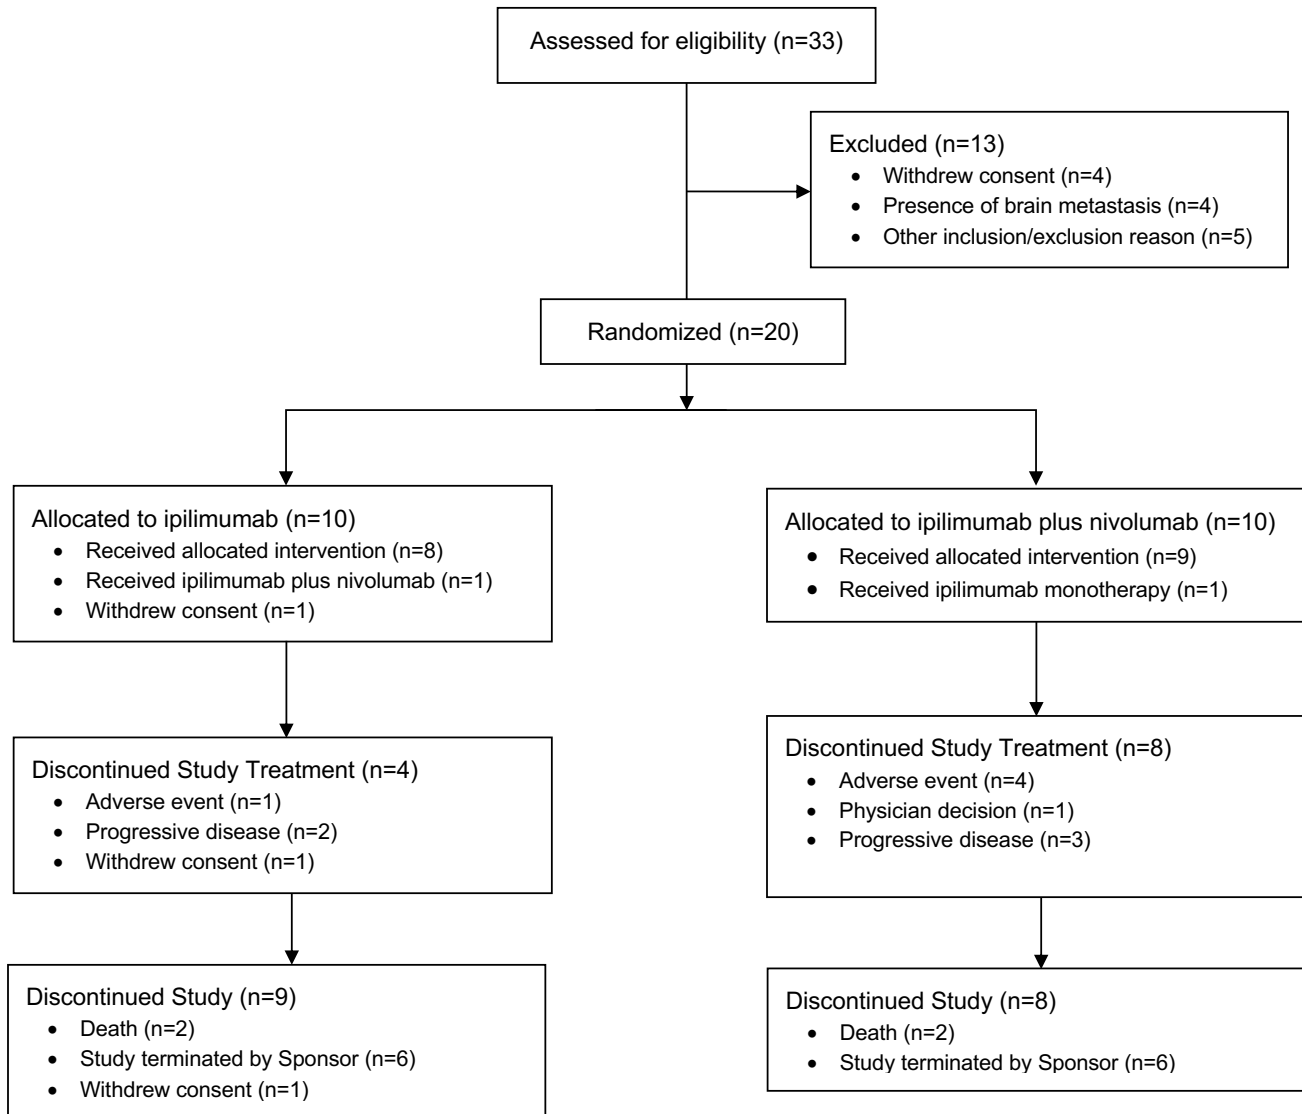

Supplement: jitc-2021-003853supp003.pdf [file jitc-2021-003853supp003.pdf]

**Fig S3. Comparison of iCOS on CD4+ and CD8+ T cells by clinical benefit within treatment arms**

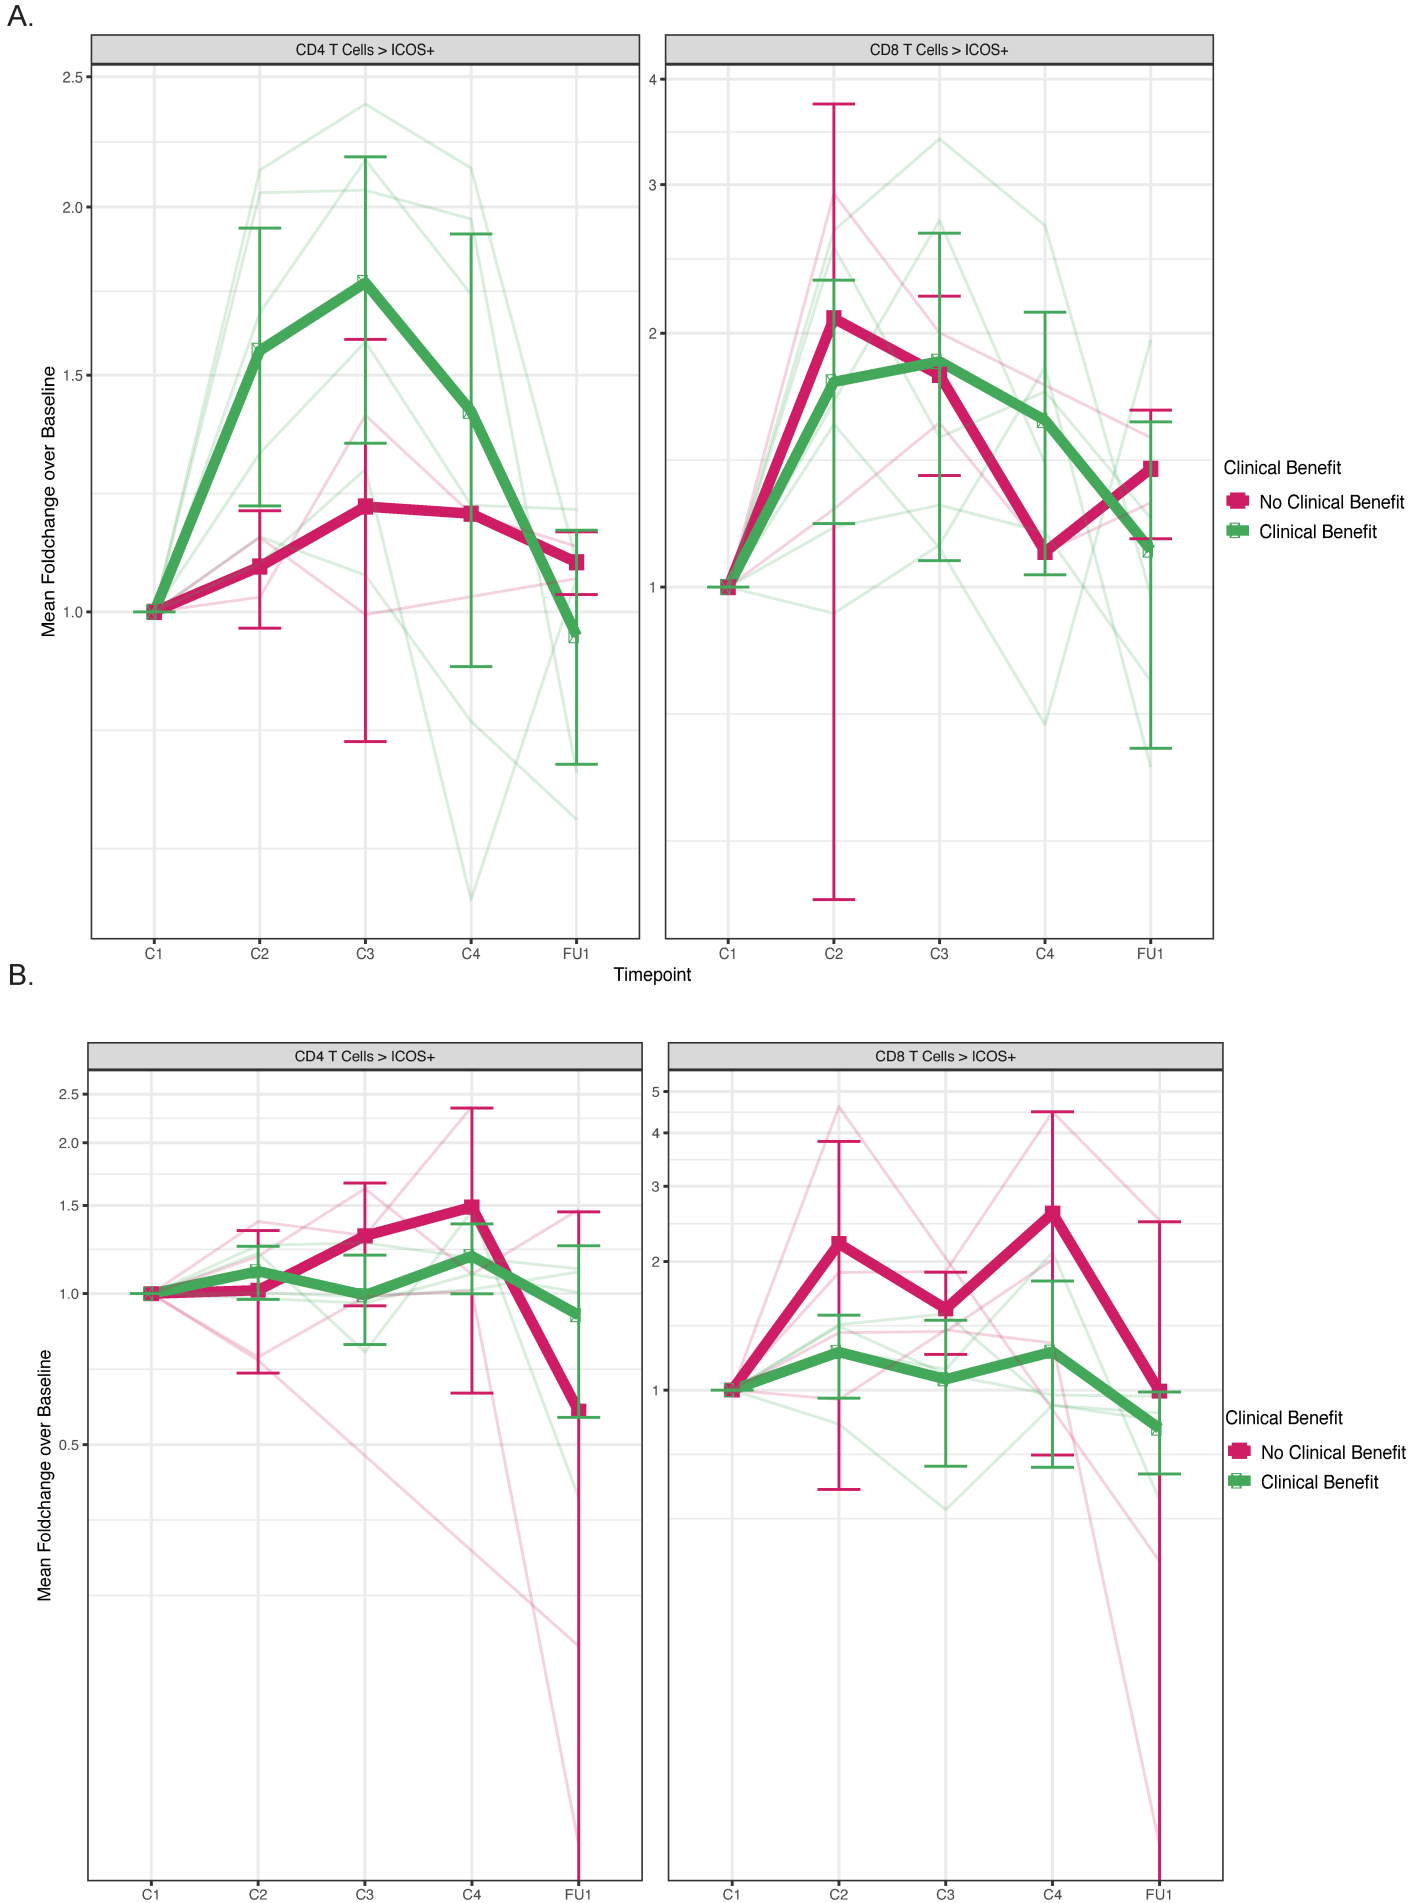

Supplement: jitc-2021-003853supp005.pdf [file jitc-2021-003853supp005.pdf]

**Fig S8. HLA gene expression from patient tumor samples by clinical benefit.**

A.

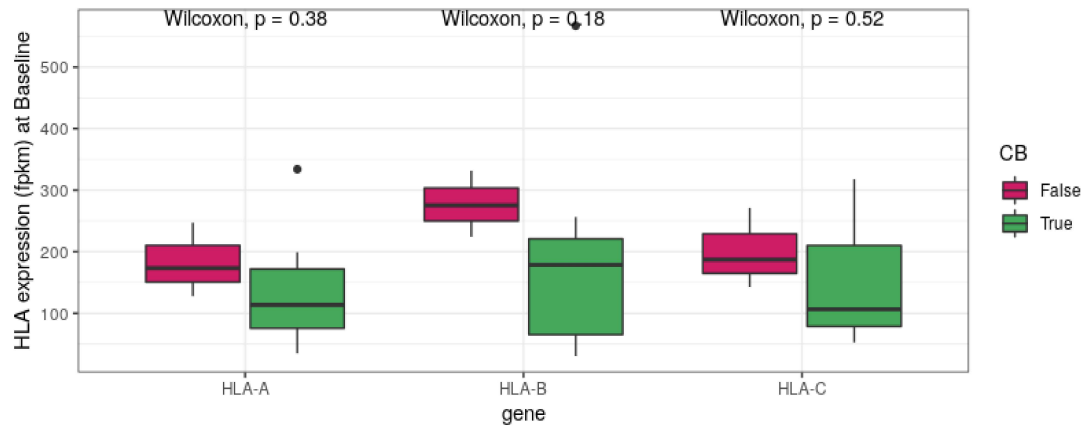

B.

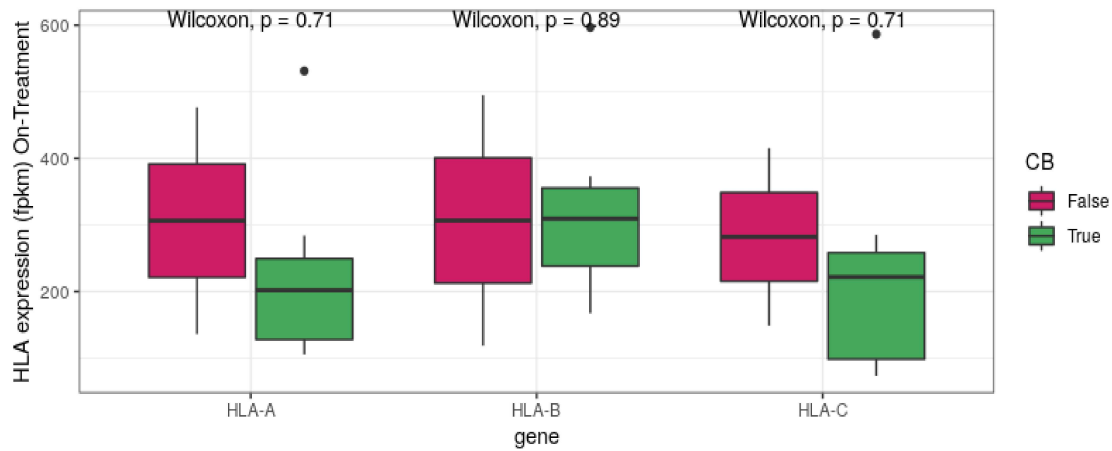

Supplement: jitc-2021-003853supp010.pdf [file jitc-2021-003853supp010.pdf]

Fig S9. Peripheral CyTOF profiling in 2 patients with discordant transcriptional profiles

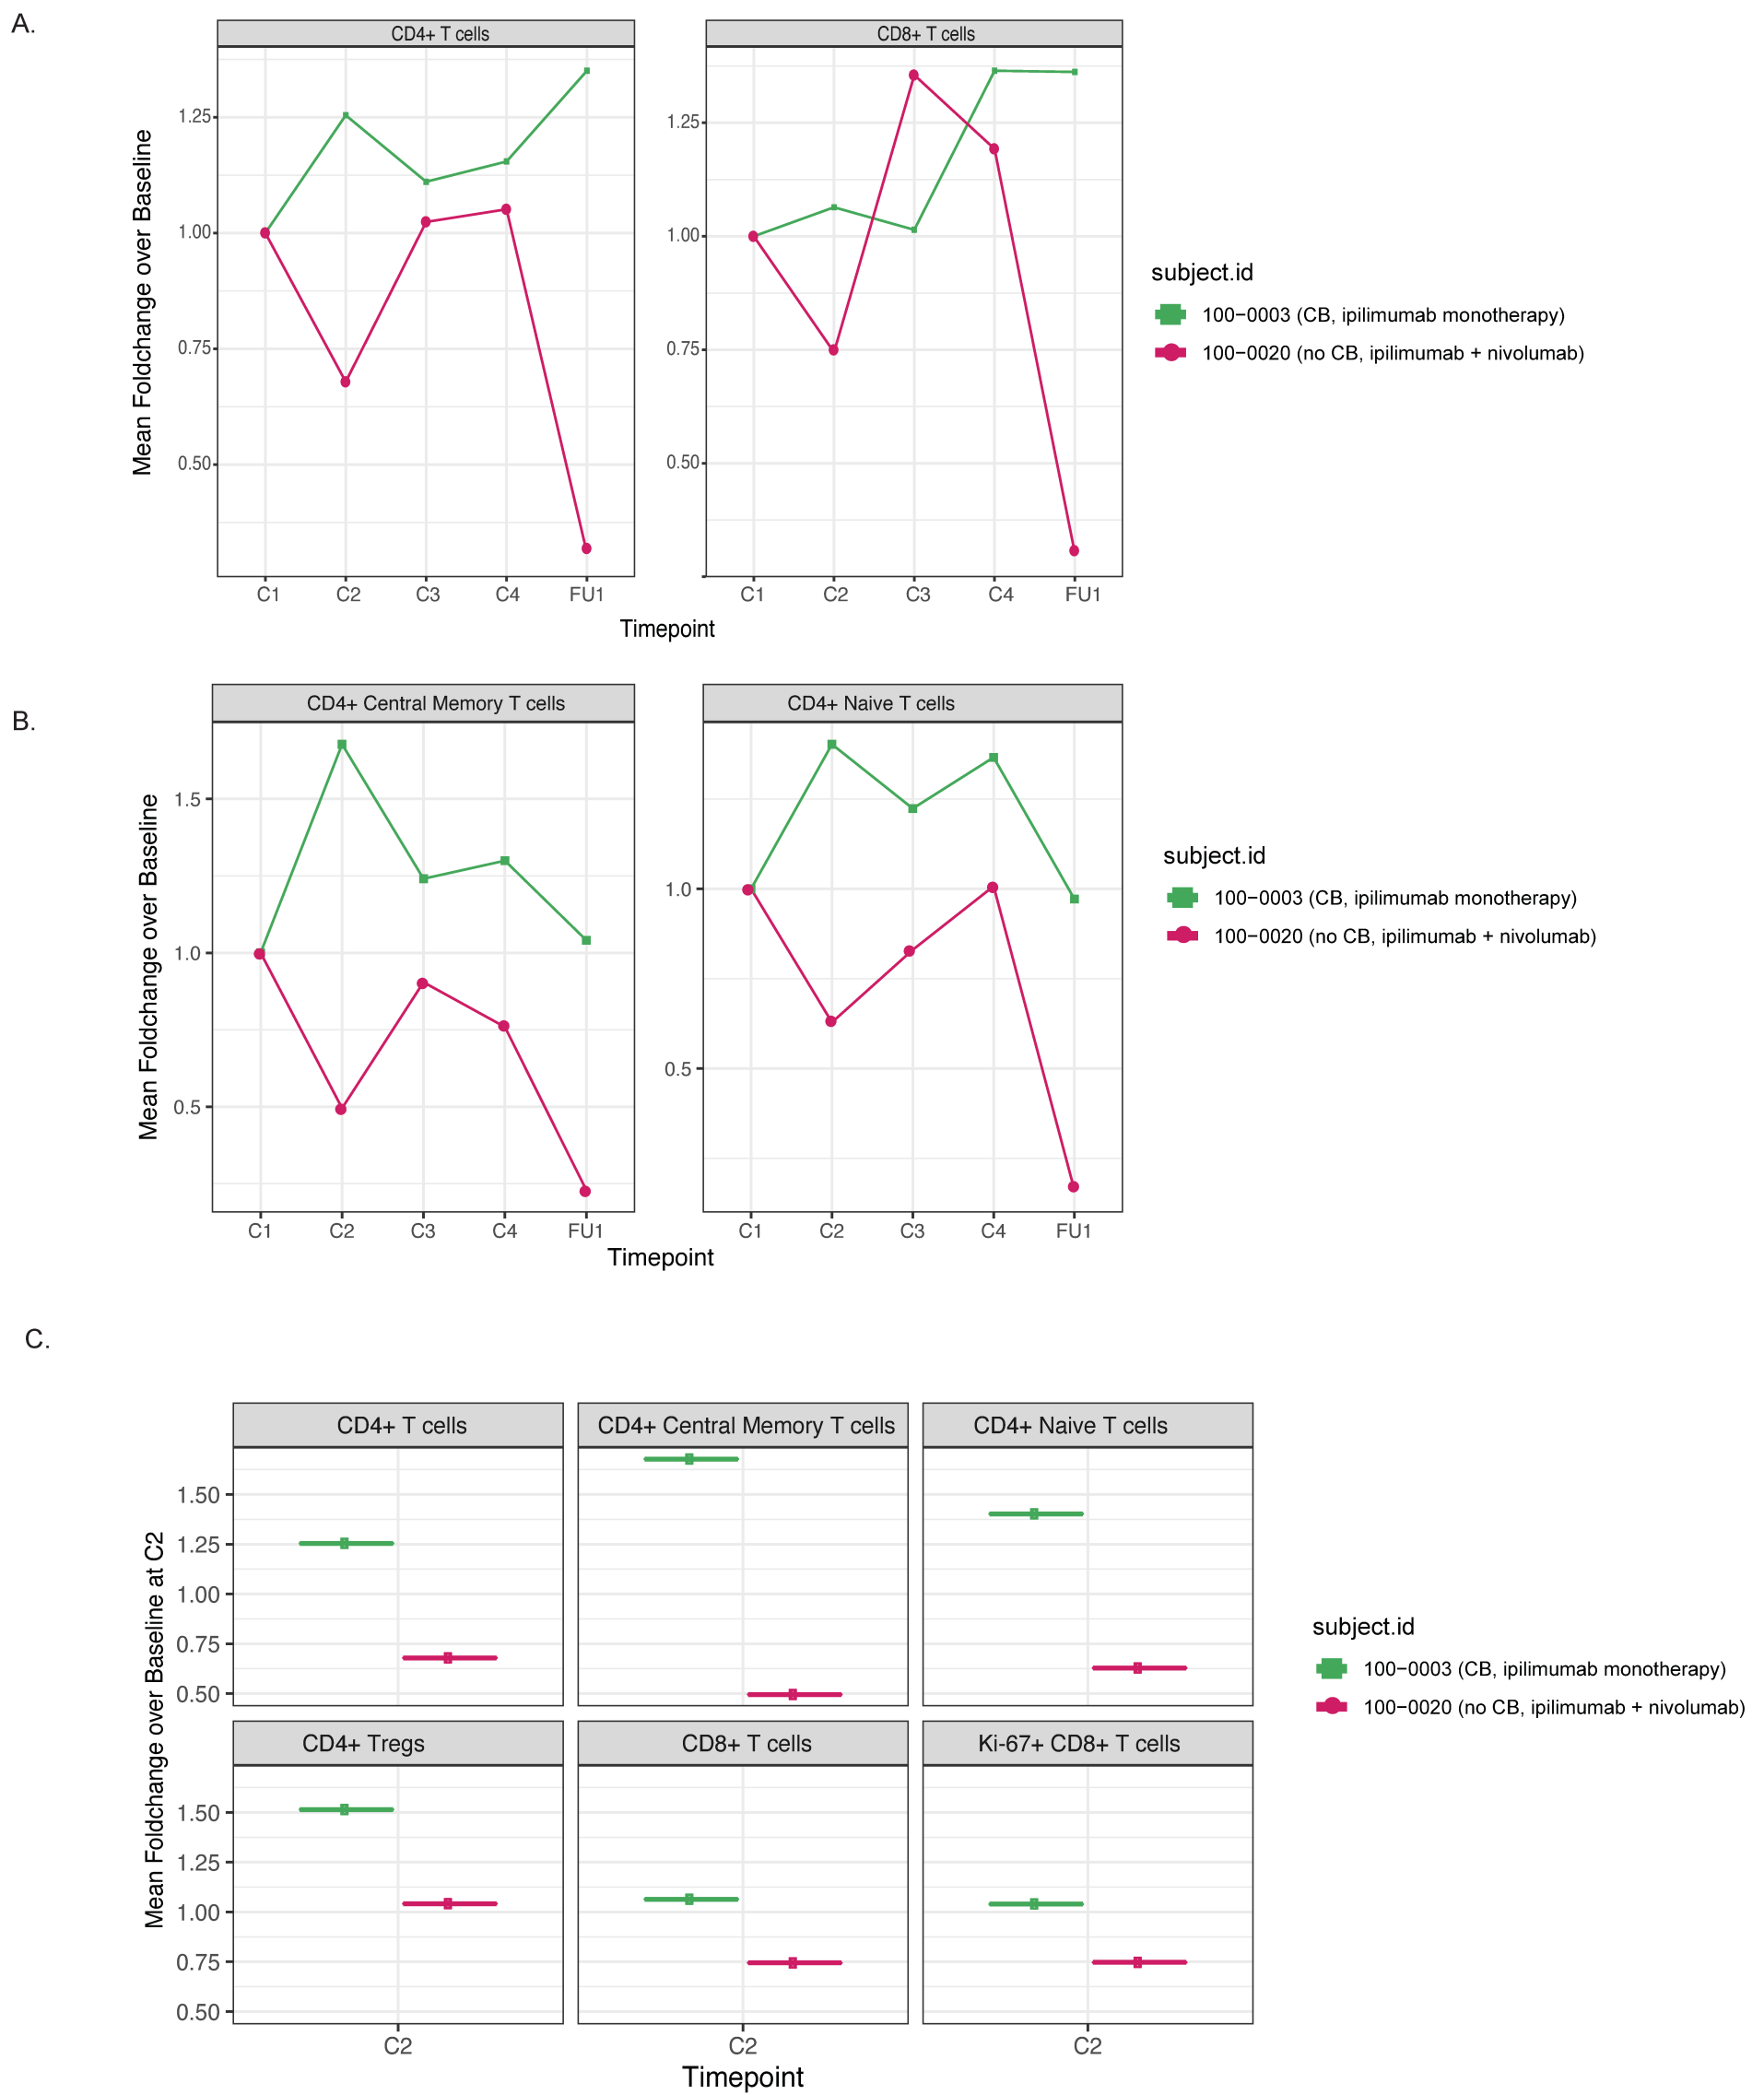

Supplement: jitc-2021-003853supp011.pdf [file jitc-2021-003853supp011.pdf]
